# Supplementary material for: Finding the right tool: a comprehensive evaluation of microglial inducible cre mouse models
Source: PubMed Central journal article supplement (PMC10153116; doi:10.1101/2023.04.17.536878), 2023-04-17
Supplement: NIHPP2023.04.17.536878v1-supplement-1.pdf [file NIHPP2023.04.17.536878v1-supplement-1.pdf]

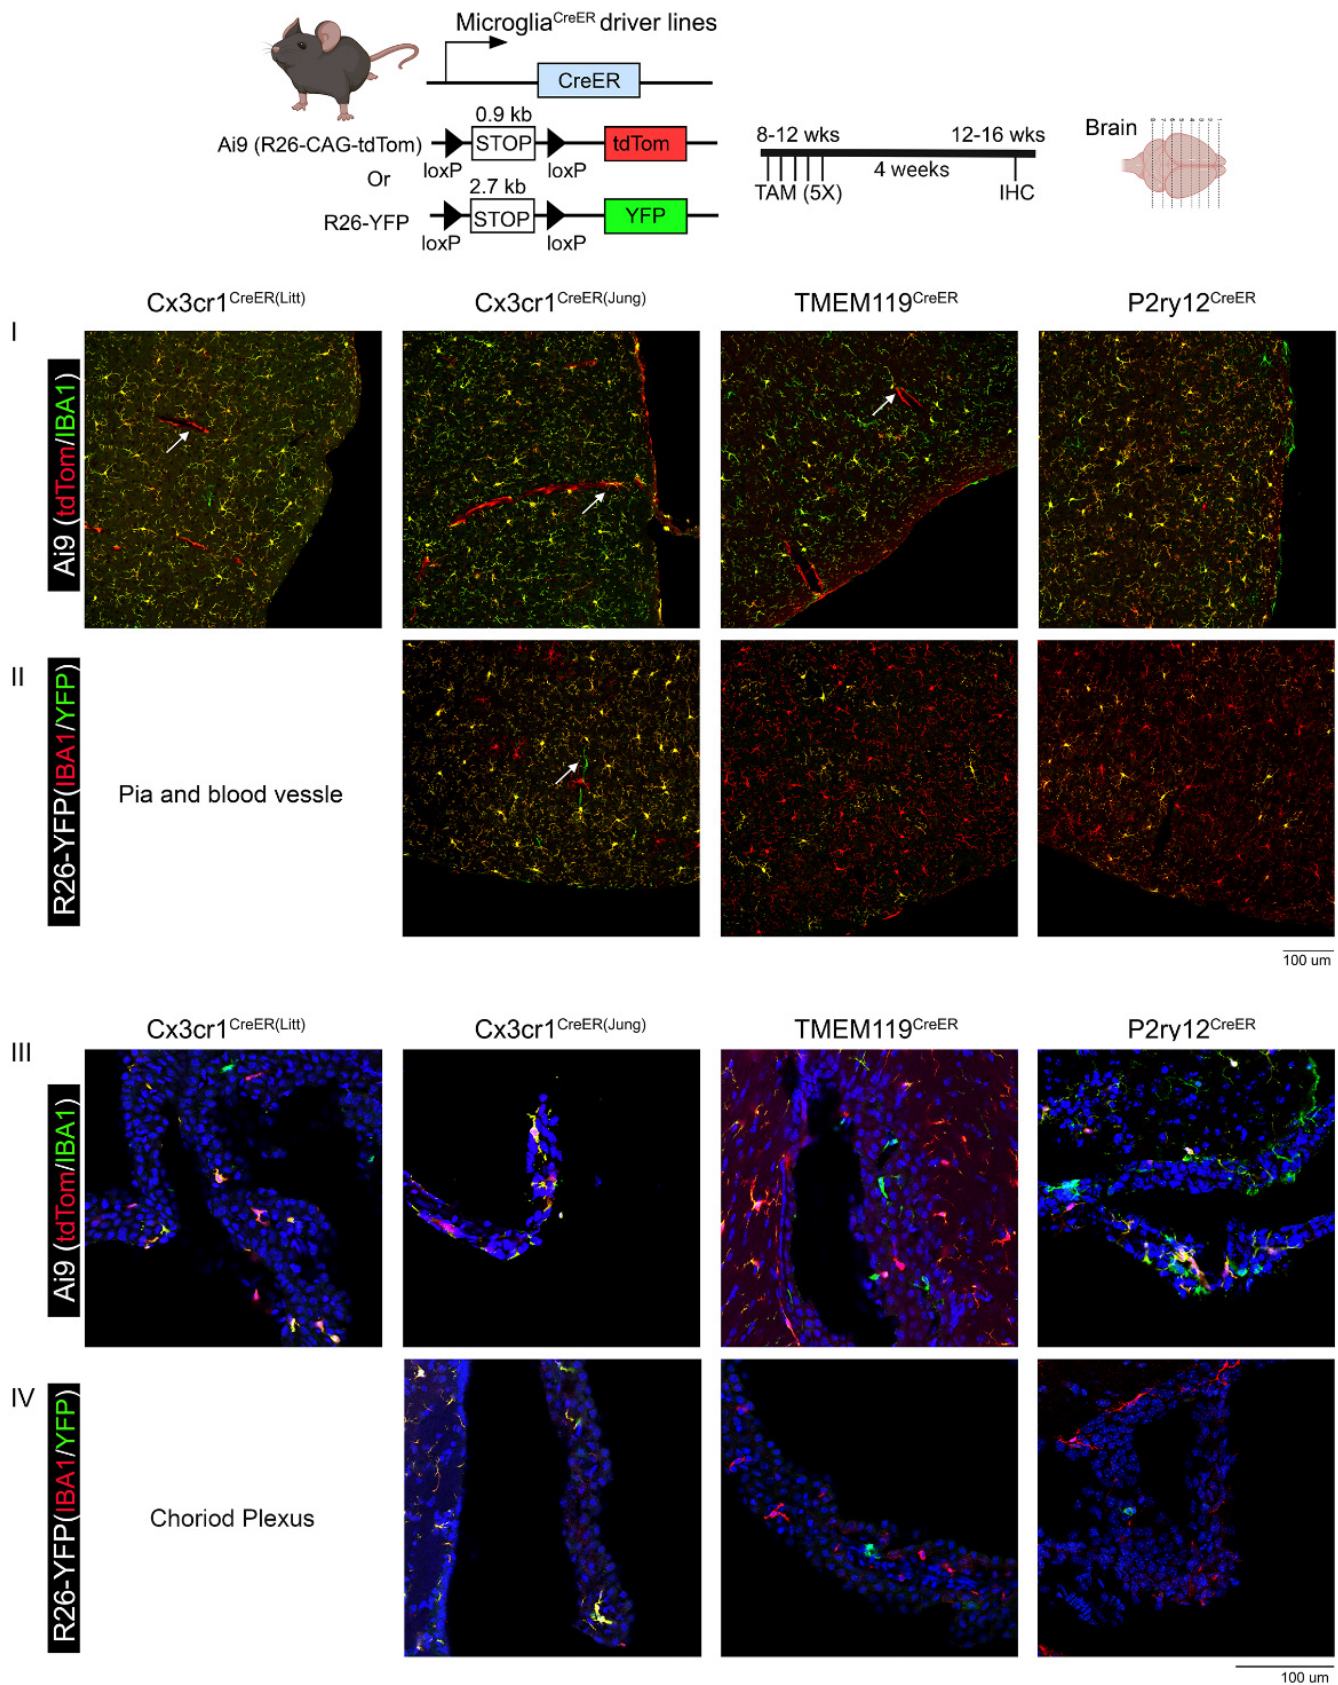

**Supplementary Figure 1.** Border Associated macrophage (BAMs) labeling in the four different creER driver lines using either the Ai9 (tdTomato) or R26-YFP reporter mouse lines. The experimental timeline is shown on top of the panel. Representative images from each cre driver and Ai 9 (I) or R26-YFP (II) reporter line in pia and blood vessel associated macrophages and choroid plexus associated macrophages (III Ai tdTomato) or (IV R26-YFP) reporter. Scale bar = 100 $\mu$ m.

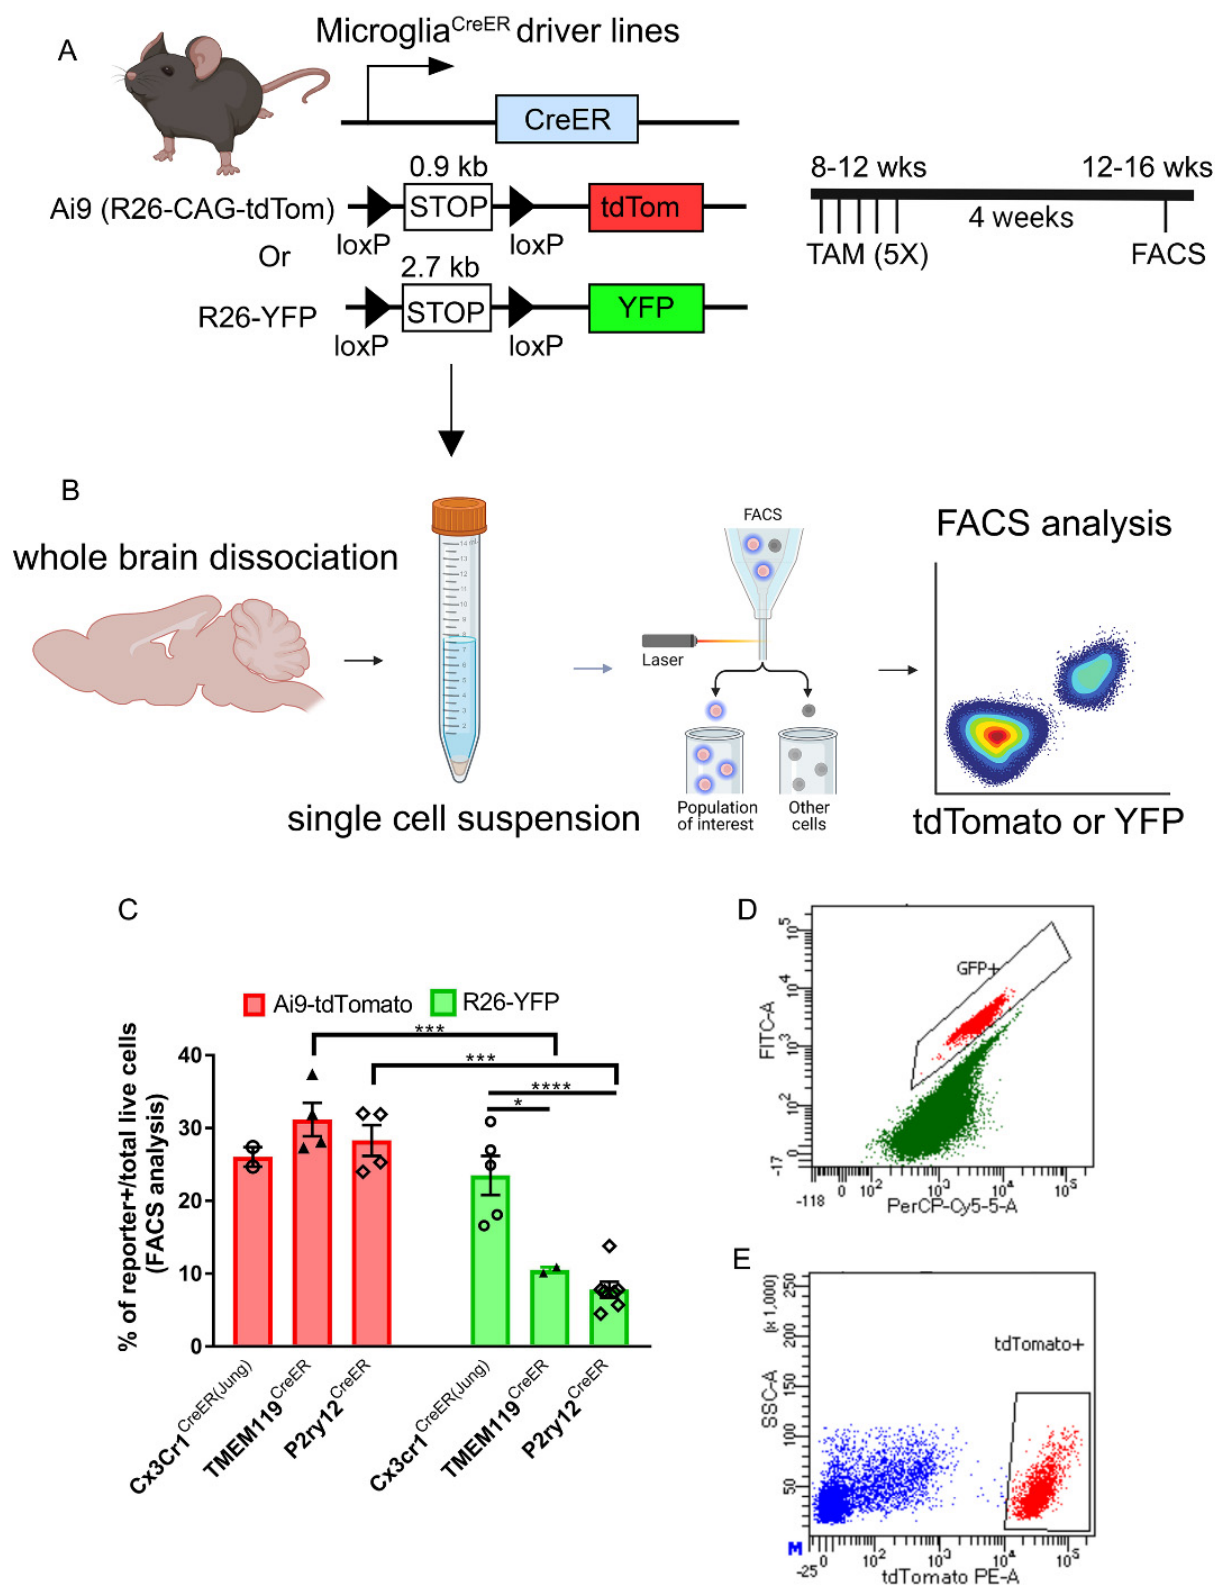

**Supplementary Figure 2.** FACS analysis of reporter-positive cells in total brain single cell resuspension confirms the reporter recombination efficiency differences among the three investigated CreER lines. tdTomato<sup>+</sup> cell percentage from all three different lines show similar high-efficiency recombination and the YFP<sup>+</sup> cells show higher recombination efficiency in the CX3CR1<sup>CreER</sup>Jung-R26-YFP mice but significantly lower recombination efficiency in the P2RY12<sup>CreER</sup>-R26-YFP mice and TMEM119<sup>CreER</sup>-R26-YFP line. Each data point represents data from one animal. \*\* $p < 0.01$  and \*\*\* $p < 0.001$ , for Two way ANOVA analysis, Tukey post-hoc pairwise analysis. Data were combined from 2-3 independent cohorts of mice for each line.

| Supplementary Table 1. Double reporter labeling of P2ry12CreER(+/-WT) after TAM                                                           |          |          |          |          |
|-------------------------------------------------------------------------------------------------------------------------------------------|----------|----------|----------|----------|
| Cell Condition                                                                                                                            | Mouse 1  | Mouse 2  | Mouse 3  | Average  |
| % of total tdTomato+                                                                                                                      | 77.77778 | 88.09524 | 81.69014 | 82.52105 |
| % of total YFP+                                                                                                                           | 45.29915 | 35.71429 | 43.66197 | 41.55847 |
| % of YFP+:tdTomato-                                                                                                                       | 22.22222 | 11.90476 | 18.30986 | 17.47895 |
| % of YFP-:tdTomato+                                                                                                                       | 54.70085 | 64.28571 | 56.33803 | 58.44153 |
| % of YFP+:tdTomato+                                                                                                                       | 23.07692 | 23.80952 | 25.35211 | 24.07952 |
| *All percentages are calculated by dividing the number of each category of cells with the total reporter positive cells from each animal. |          |          |          |          |

**Supplementary Table 1.** Quantification of the FACS analysis of the reporter+ microglia in whole brain single cell suspension prepared from the P2RY12CreER-Ai9-R26-YFP mice after TAM treatment.
